# Supplementary material for: The GENCODE exome: sequencing the complete human exome
Source: PubMed Central journal article supplement — Eur J Hum Genet. 2011 Mar 2;19(7):827–31. doi: 10.1038/ejhg.2011.28 (PMC3137498; doi:10.1038/ejhg.2011.28), 2011-03-02
Supplement: ejhg201128x1.pdf [file ejhg201128x1.pdf]

# The GENCODE exome – sequencing the complete human exome

Alison J. Coffey, Felix Kokocinski, Maria S. Calafato, Carol E. Scott, Priit Palta, Eleanor Drury, Christopher J. Joyce, Emily M. LeProust, Jen Harrow, Sarah Hunt, Anna-Elina Lehesjoki, Daniel J. Turner, Tim J. Hubbard, Aarno Palotie.

## Supplementary content

|          |                                                                                                            |
|----------|------------------------------------------------------------------------------------------------------------|
| Figure 1 | Cumulative coverage achieved by the GENCODE exome                                                          |
| Table 1  | Comparison data between the three exome sets<br>a. to external annotation<br>b. to the design target       |
| Table 2  | Mapping characteristics (sequence yield and reads mapping back to target) from clinical and HapMap samples |
| Table 3  | Repeat and low-complexity coverage                                                                         |
| Table 4  | Bait/probe covered CTR (Capture Target Regions) regions assessed using a uniqueness mask                   |
| Data 1   | GENCODE exome design target                                                                                |
| Data 2   | GENCODE exome baits                                                                                        |
| Data 3   | GENCODE exome exclusive regions                                                                            |
| Data 4   | GENCODE exome exclusive genes                                                                              |

## Supplementary Figures

### Supplementary Figure 1: Cumulative coverage achieved by the GENCODE exome.

Cumulative fold coverage plot for clinical samples captured with Agilent SureSelect Human All Exon Kit, the GENCODE exome; and the regions covered by the GENCODE exome only. The thin red vertical line indicates fold coverage of 8X, the minimum coverage required for variant calling.

### Supplementary Figure 1

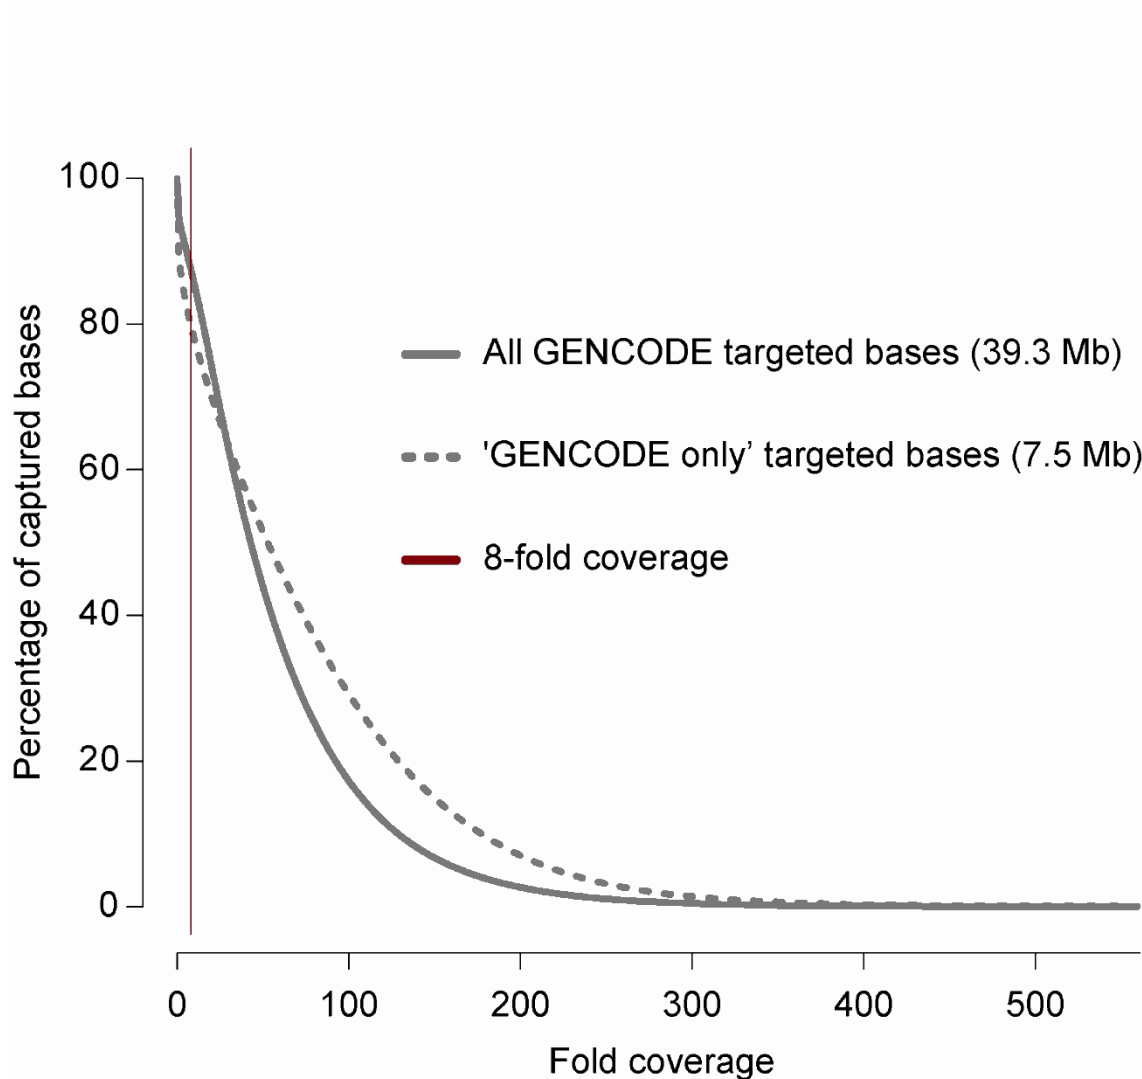

## Supplementary Tables

### Supplementary Table 1: Comparison data between the three exome sets

a. Comparison of external annotation (Gene Ontology, OMIM ids and HGNC names) based on Ensembl v57 for the three exome sets.

| <b>Exome set</b>                                                 | <b>CCDS<br/>exons</b> | <b>CCDS<br/>transcripts</b> | <b>RefSeq<br/>exons</b> | <b>RefSeq<br/>transcripts</b> | <b>GENCODE<br/>exons</b> | <b>GENCODE<br/>transcripts</b> |
|------------------------------------------------------------------|-----------------------|-----------------------------|-------------------------|-------------------------------|--------------------------|--------------------------------|
| <b>NimbleGen Sequence<br/>Capture 2.1M Human<br/>Exome Array</b> | 82.80%                | 87.19%                      | 79.47%                  | 85.28%                        | 75.29%                   | 79.16%                         |
| <b>Agilent SureSelect<br/>Human All Exon Kit</b>                 | 90.05%                | 93.16%                      | 86.39%                  | 90.91%                        | 82.15%                   | 84.67%                         |
| <b>GENCODE exome</b>                                             | 99.18%                | 99.63%                      | 98.75%                  | 99.19%                        | 97.31%                   | 96.51%                         |
| <b>Additional content<br/>on GENCODE</b>                         | 9.12%                 |                             | 12.36%                  |                               |                          |                                |

b. Coverage statistics of the design target by the three exome sets.

|                                                               | <b>gene<br/>number</b> | <b>transcript<br/>number</b> | <b>exon<br/>number</b> |
|---------------------------------------------------------------|------------------------|------------------------------|------------------------|
| <b>not covered</b>                                            | 378                    | 422                          | 2856                   |
| <b>covered by Agilent CCDS only</b>                           | 0                      | 0                            | 0                      |
| <b>covered by Nimblegen CCDS only</b>                         | 10                     | 12                           | 318                    |
| <b>covered by Nimblegen &amp; Agilent CCDS<br/>only</b>       | 0                      | 0                            | 0                      |
| <b>covered by Nimblegen CCDS &amp; Gencode<br/>exome only</b> | 365                    | 873                          | 4065                   |
| <b>covered by Agilent CCDS &amp; Gencode<br/>exome only</b>   | 2202                   | 5336                         | 30708                  |
| <b>covered by Gencode exome only</b>                          | 5594                   | 9052                         | 59600                  |
| <b>covered by all 3</b>                                       | 27828                  | 65943                        | 303483                 |
|                                                               |                        |                              |                        |
| <b><u>totals</u></b>                                          | 36853                  | 82522                        | 463778                 |
| <b>Agilent CCDS</b>                                           | 30030                  | 71279                        | 334191                 |
| <b>Nimblegen CCDS</b>                                         | 28203                  | 66828                        | 307866                 |
| <b>Gencode exome</b>                                          | 35989                  | 81204                        | 397856                 |
|                                                               |                        |                              |                        |
| <b><u>percents</u></b>                                        |                        |                              |                        |
| <b>Agilent CCDS</b>                                           | 81.5%                  | 86.4%                        | 72.1%                  |
| <b>Nimblegen CCDS</b>                                         | 76.5%                  | 81.0%                        | 66.4%                  |
| <b>Gencode exome</b>                                          | 97.7%                  | 98.4%                        | 85.8%                  |

Supplementary Table 2: Mapping characteristics (sequence yield and reads mapping back to target) from clinical and HapMap samples using GENCODE and Agilent CCDS exome captures.

| Sample name                                                                              | Sanger #1             | Sanger #2             | Sanger #3             | Sanger #4            | Sanger #5             | Sanger #6             | Sanger #7             | NA12878               | NA07000               | NA19240               | NA12878               | NA07000               | NA19240               |
|------------------------------------------------------------------------------------------|-----------------------|-----------------------|-----------------------|----------------------|-----------------------|-----------------------|-----------------------|-----------------------|-----------------------|-----------------------|-----------------------|-----------------------|-----------------------|
| Bait library                                                                             | GENCODE               |                       |                       |                      |                       |                       |                       | Agilent CCDS          |                       |                       |                       |                       |                       |
| Lanes sequenced                                                                          | 3                     | 3                     | 3                     | 3                    | 3                     | 3                     | 3                     | 4                     | 3                     | 3                     | 3                     | 4                     | 4                     |
| Reads                                                                                    | 105712968             | 115540748             | 107420522             | 101912732            | 129221672             | 205597102             | 203472750             | 249957386             | 216080714             | 175087650             | 131337304             | 174698654             | 206110412             |
| Reads mapped all ( $\geq q0$ ) <sup>1</sup>                                              | 101784111<br>(96.28%) | 112290675<br>(97.19%) | 104444274<br>(97.23%) | 99877068<br>(98.00%) | 126463612<br>(97.87%) | 197922085<br>(96.27%) | 196009151<br>(96.33%) | 237675276<br>(95.09%) | 212171108<br>(98.19%) | 168827968<br>(96.42%) | 123007651<br>(93.66%) | 169580062<br>(97.07%) | 198938967<br>(96.52%) |
| Reads mapped unique ( $\geq q10$ , duplicates removed) <sup>2</sup>                      | 77800441<br>(76.44%)  | 81310815<br>(72.41%)  | 74873012<br>(71.69%)  | 74979882<br>(75.07%) | 97666019<br>(77.23%)  | 145520170<br>(73.52%) | 143615416<br>(73.27%) | 134894523<br>(56.76%) | 122795772<br>(57.88%) | 77220371<br>(45.74%)  | 91946948<br>(74.75%)  | 97248119<br>(57.35%)  | 117233076<br>(58.93%) |
| Unique reads mapped to CTR +/- 250bp <sup>3</sup>                                        | 59625505<br>(76.64%)  | 69956576<br>(80.04%)  | 65714990<br>(87.77%)  | 63735274<br>(85.00%) | 68908856<br>(70.56%)  | 86495628<br>(59.44%)  | 86910473<br>(60.52%)  | 124450772<br>(92.26)  | 113776953<br>(92.66%) | 71794822<br>(92.97%)  | 83772118<br>(91.11%)  | 89399731<br>(91.93%)  | 99555617<br>(84.92%)  |
| Unique reads mapped to GENCODE exome cluster regions (including 10bp flank) <sup>3</sup> | 40507262<br>(52.07%)  | 47280119<br>(58.15%)  | 46480228<br>(62.08%)  | 43032073<br>(57.39%) | 45129213<br>(46.21%)  | 66486708<br>(67.96%)  | 66344444<br>(46.20%)  | 84566996<br>(62.69%)  | 81625999<br>(66.47%)  | 51683594<br>(66.93%)  | 56713564<br>(61.68%)  | 66088857<br>(67.96%)  | 69982605<br>(59.70%)  |
| Mean depth GENCODE exome cluster regions (including 10bp flank)                          | 46.38                 | 54.08                 | 53.45                 | 49.83                | 51.02                 | 76.96                 | 76.61                 | 95.37                 | 92.37                 | 58.81                 | 65.08                 | 75.92                 | 80.14                 |
| Median depth GENCODE exome cluster regions (including 10 bp flank)                       | 34                    | 39                    | 35                    | 34                   | 36                    | 55                    | 55                    | 63                    | 62                    | 36                    | 43                    | 47                    | 57                    |
| GENCODE exome cluster region bases $\geq 8x$ <sup>4</sup>                                | 32914133<br>(83.66%)  | 33102756<br>(84.14%)  | 32201108<br>(81.85%)  | 32536951<br>(82.70%) | 32220983<br>(81.90%)  | 35330571<br>(89.80%)  | 34963040<br>(88.87%)  | 32415365<br>(82.39%)  | 32910800<br>(83.65%)  | 31502723<br>(80.07%)  | 28721876<br>(73.01%)  | 28903556<br>(73.47%)  | 29429202<br>(74.80%)  |

<sup>1</sup> Percentage of "Reads" in brackets

<sup>2</sup> Percentage of "Reads mapped all" in brackets

<sup>3</sup> Percentage of "Reads mapped unique" in brackets

<sup>4</sup> Percentage of GENCODE exome design target (39.3 Mb) in brackets

Supplementary Table 3: Assessment of repeat and low-complexity coverage of the three exome sets.

Repeats and low-complexity regions identified with RepeatMasker (parameters: *-nolow -species homo -s*), Dust and TRF using Ensembl 53 data.

| <b>Exome Set</b>      | <b>total bp</b> | <b>bp with repeats</b> | <b>ratio</b> |
|-----------------------|-----------------|------------------------|--------------|
| <b>Nimblegen-CCDS</b> | 34,108,810      | 884,080                | 38.6         |
| <b>Agilent-CCDS</b>   | 37,640,396      | 799,357                | 47.1         |
| <b>GENCODE exome</b>  | 47,933,967      | 1,303,879              | 36.8         |

Supplementary Table 4: Bait/probe covered CTR (Capture Target Regions) regions assessed using a uniqueness mask developed by Heng Li for the 1000 Genomes project  
([ftp://ftp.1000genomes.ebi.ac.uk/vol1/ftp/pilot\\_data/technical/reference/README\\_hs36\\_uniqueness\\_mask](ftp://ftp.1000genomes.ebi.ac.uk/vol1/ftp/pilot_data/technical/reference/README_hs36_uniqueness_mask))

| Exome Supplier | CTR (Capture Target Regions) count | Total target size (bp) | Type 0 bases                       | Type 1 bases         | Type 2 bases         | Type 3 bases           |
|----------------|------------------------------------|------------------------|------------------------------------|----------------------|----------------------|------------------------|
| Agilent        | 165,637<br>(316,000 baits)         | 37,640,396             | 0 (0.00%)                          | 1,570,956<br>(4.17%) | 838,459<br>(2.23%)   | 35,230,981<br>(93.60%) |
| Nimblegen      | 176,159<br>(197,218 baits)         | 34,108,807             | 17688<br>(0.05%)<br>Y (X/Y masked) | 1,236,875<br>(3.63%) | 745,619<br>(2.19%)   | 32,108,625<br>(94.14%) |
| GENCODE exome  | 206,275<br>(406,539 baits)         | 47,933,967             | 0 (0.00%)                          | 2,811,712<br>(5.87%) | 1,177,904<br>(2.46%) | 43,944,351<br>(91.68%) |

Sequenceability/uniqueness measures used in the method:

- Type 0 : all 35mers covering this site cannot be mapped back due to "N"s in the reference
- Type 3 :  $\geq 35 \times 0.5$  reads 2-away unique
- Type 2 : if not 3,  $\geq 35 \times 0.5$  reads 1-away unique
- Type 1 : otherwise ( $>35 \times 0.5$  reads are exact repeats)

## Supplementary Data

(as separate files available at <ftp.sanger.ac.uk/pub/gencode/exome>)

### Data 1: GENCODE exome design target

Genomic coordinates (NCBI36) of CDS regions of protein-coding genes and miRNAs (ECRs) from Ensembl and Havana selected as the design targets for the GENCODE exome in GTF 2.2 format. Annotated with Ensembl 53 as the source database.

### Data 2: GENCODE exome baits

Genomic coordinates (NCBI36) of the baits of the GENCODE exome based on the design target in GTF 2.2 format. Annotated with Ensembl 58 as the latest information available.

### Data 3: GENCODE exome exclusive regions

Genomic coordinates (NCBI36) of the bait regions present on the GENCODE exome, but missing from the Agilent and Nimblegen products in GTF 2.2 format; annotated with Ensembl 58 as the latest information available.

### Data 4: GENCODE exome exclusive genes

List of genes present on the GENCODE exome, but missing from the Agilent and Nimblegen products in GTF 2.2 format using NCBI36.

The list contains genes originating from the Ensembl 53 database as well as genes from a snapshot of the Havana manual annotation database (Feb. 2009). The former were annotated with data from their source database, the latter from the VEGA database where possible. Genes from the PAR regions are listed with their X and Y locations. To avoid double-counting the numbers describing the GENCODE-only content in the text were based on Ensembl genes only, with PAR genes listed only once.
